# Supplementary material for: A new stable CNHC⁁CH⁁CNHCN-heterocyclic dicarbene ligand: its mono- and dinuclear Ir(i) and Ir(i)–Rh(i) complexes
Source: Royal Society of Chemistry journal article supplement (doi:10.1039/b902733e), 2009-01-01

Supporting Information for:

**A new stable  $C_{NHC}^{\wedge}CH^{\wedge}C_{NHC}$  *N*-heterocyclic dicarbene ligand: its mono- and dinuclear Ir(I) and Ir(I)-Rh(I) complexes**

**Matthieu Raynal,<sup>a</sup> Catherine S. J. Cazin,<sup>a,b</sup> Christophe Vallée,<sup>c</sup> Hélène Olivier-Bourbigou<sup>c</sup> and Pierre Braunstein<sup>\*a</sup>**

---

**S1.** Formula of ligands and complexes described in this paper.

**S2.** NMR spectra of compounds **1-11**.

---

<sup>a</sup> *Laboratoire de Chimie de Coordination, Institut de Chimie, UMR 7177 CNRS, Université de Strasbourg, 4 rue Blaise Pascal, F-67070 Strasbourg Cedex, France. E-mail: [braunstein@chimie.u-strasbg.fr](mailto:braunstein@chimie.u-strasbg.fr); Fax: +33 390 241 322*

<sup>b</sup> *Current address: School of Chemistry, University of St Andrews, North Haugh, St Andrews, KY16 9ST, UK.*

<sup>c</sup> *IFP-Lyon, Rond Point de l'Echangeur de Solaize, BP3, 69360 Solaize.*

## S1. Formula of ligands and complexes

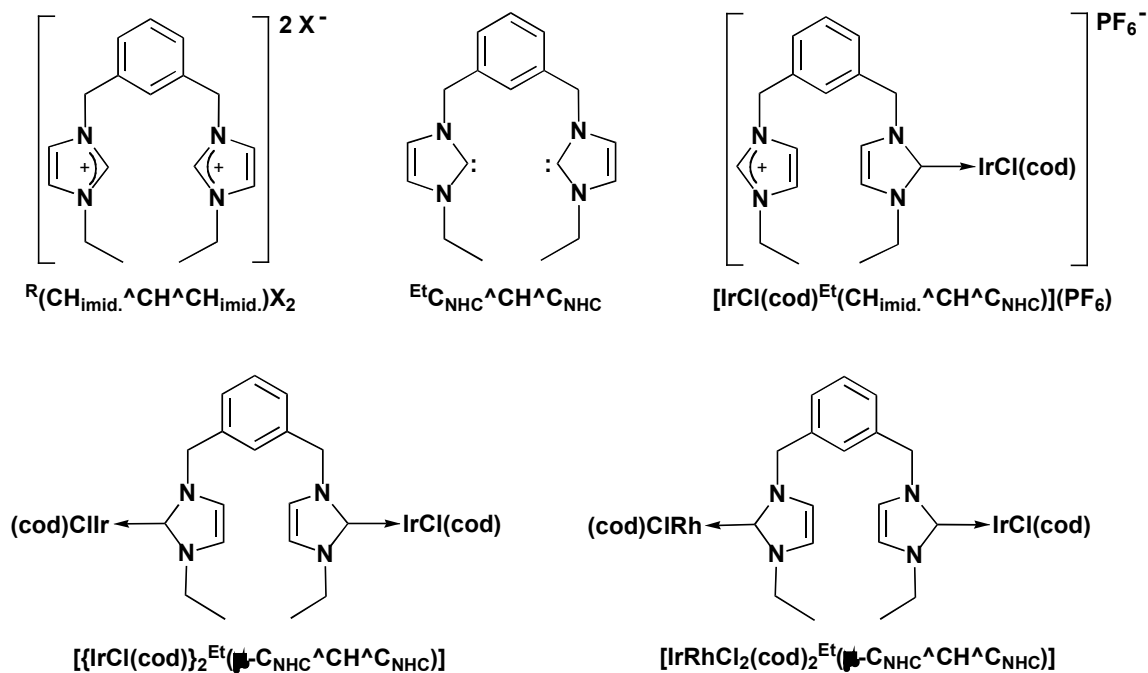

## S2. NMR spectra of compounds 1-11.

compound **1** ( $^1\text{H}$ , DMSO)

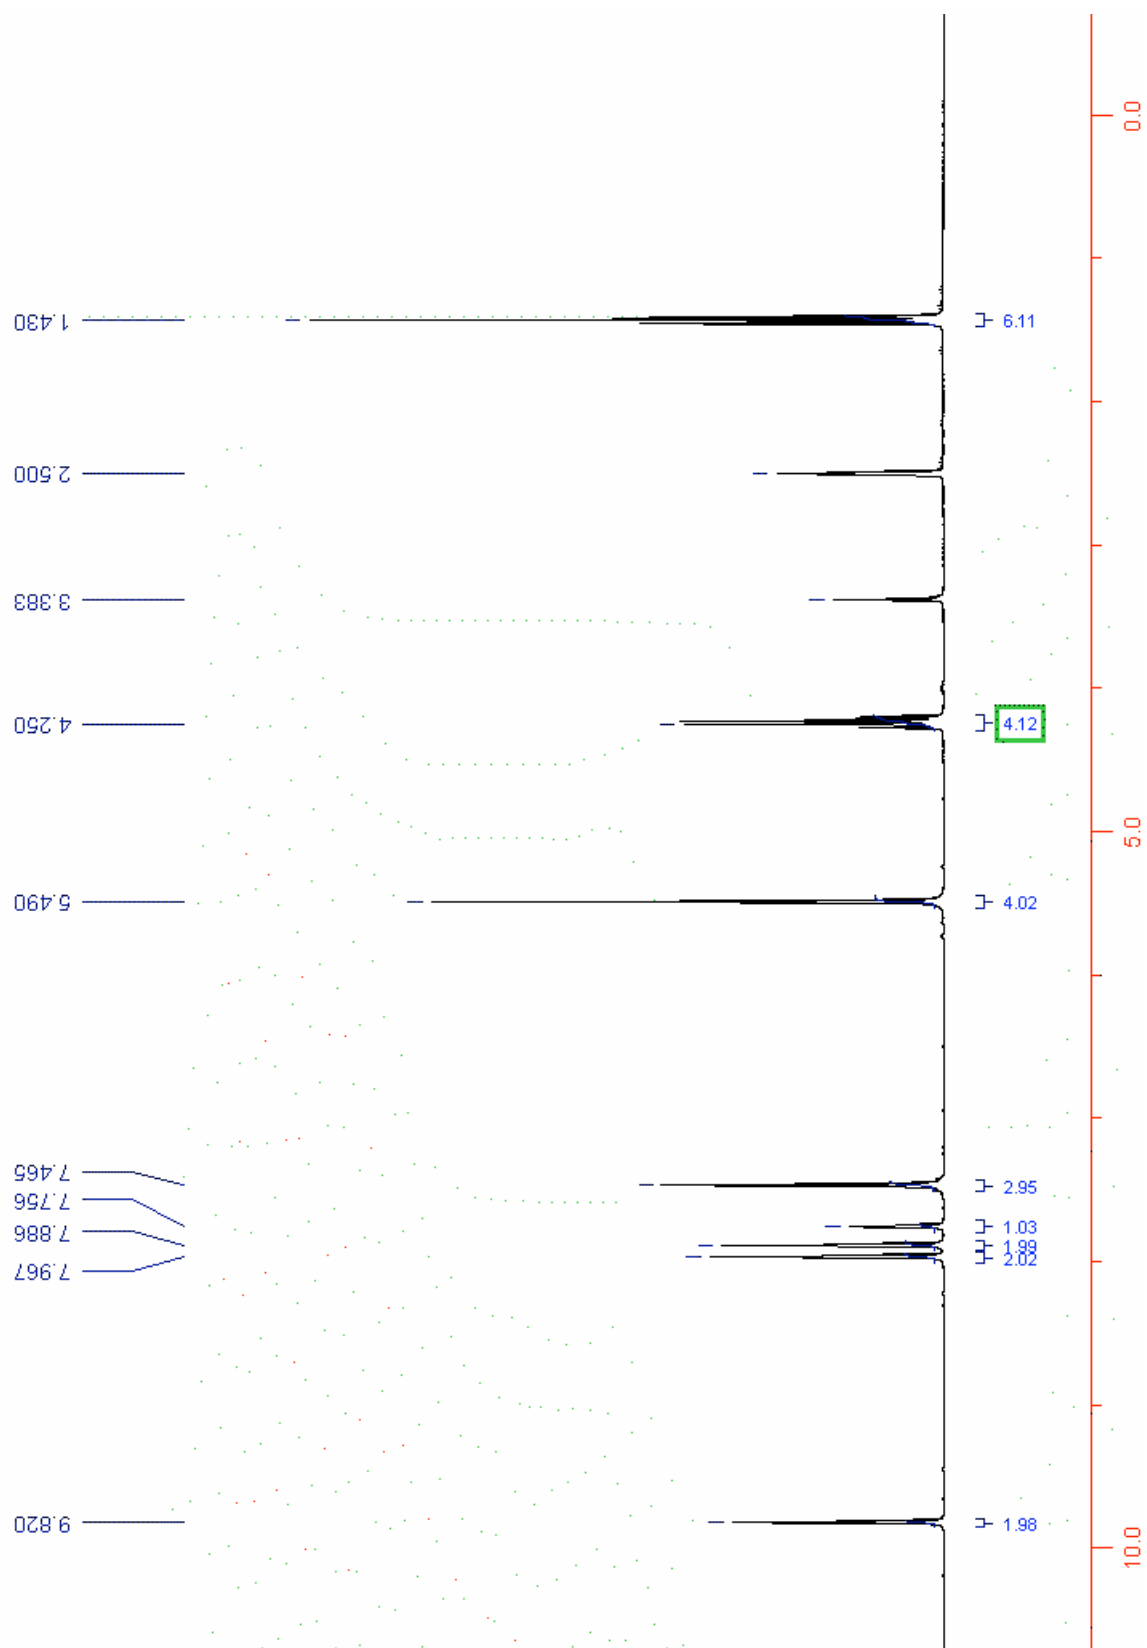

compound 1 ( $^{13}\text{C}$ , DMSO)

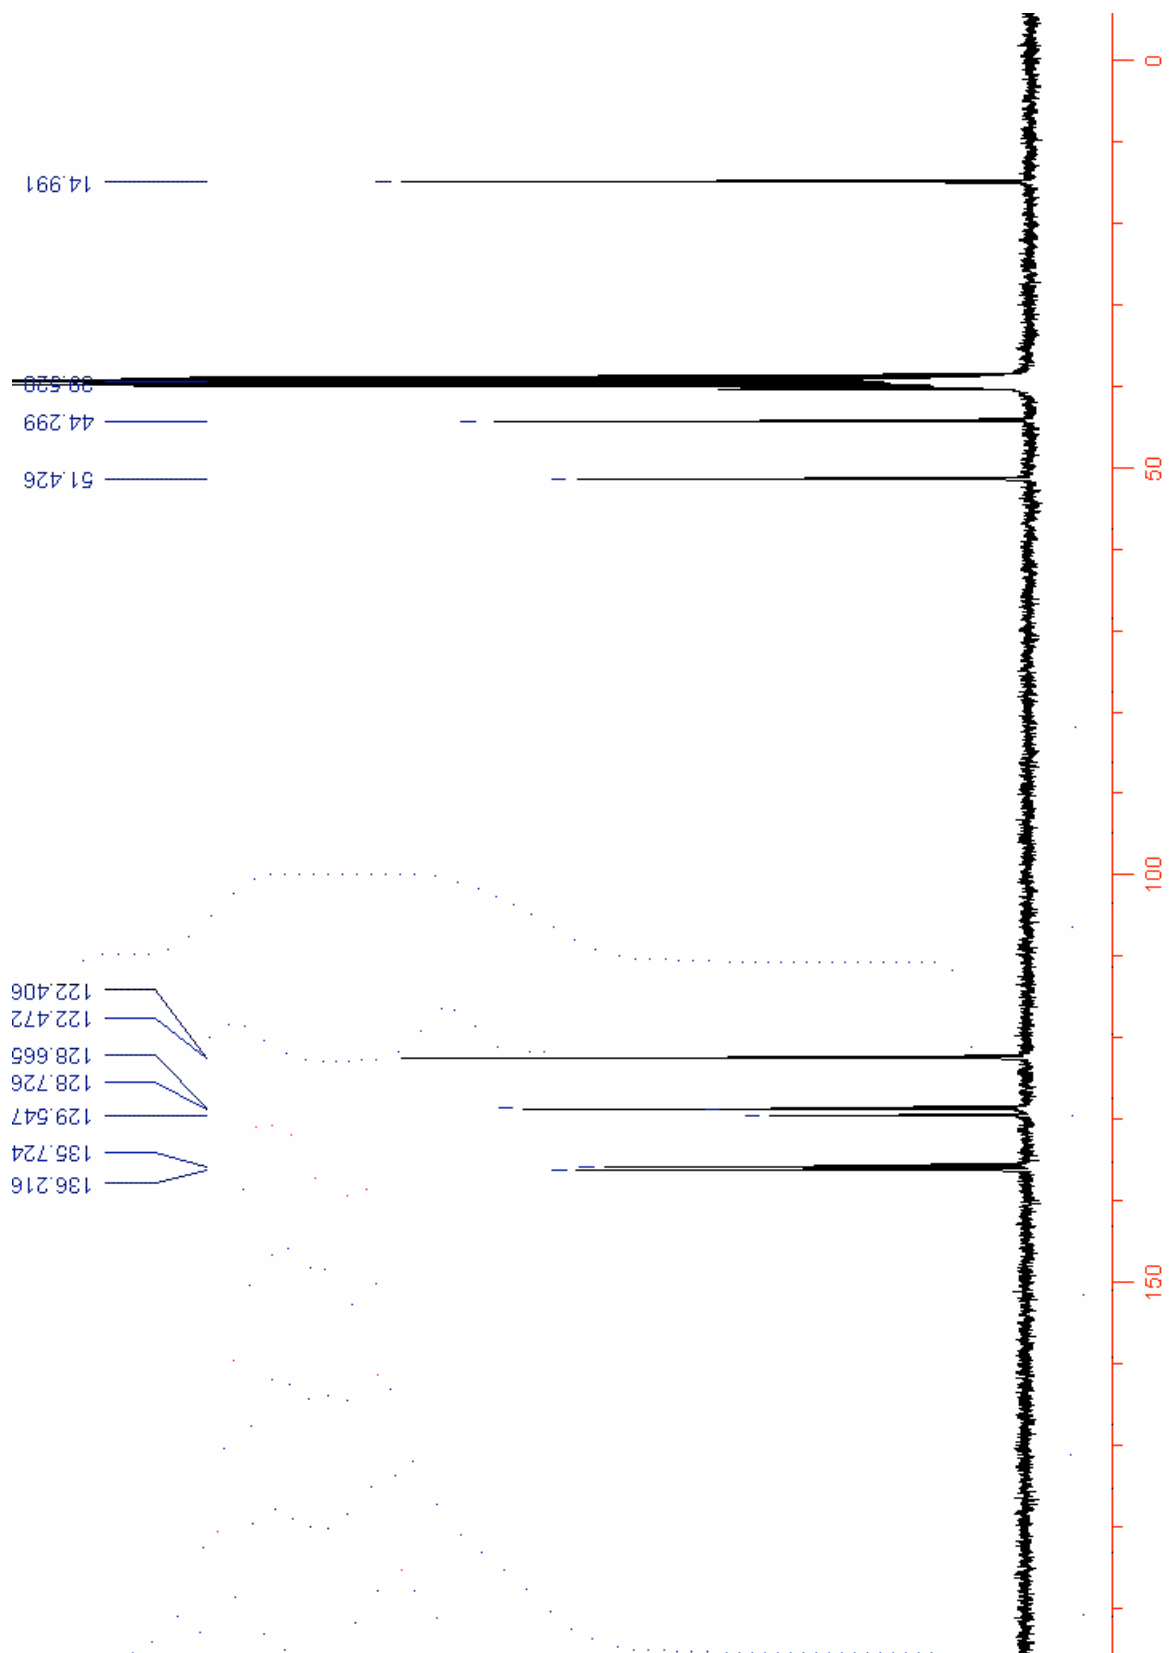

compound 2 ( $^1\text{H}$ , DMSO)

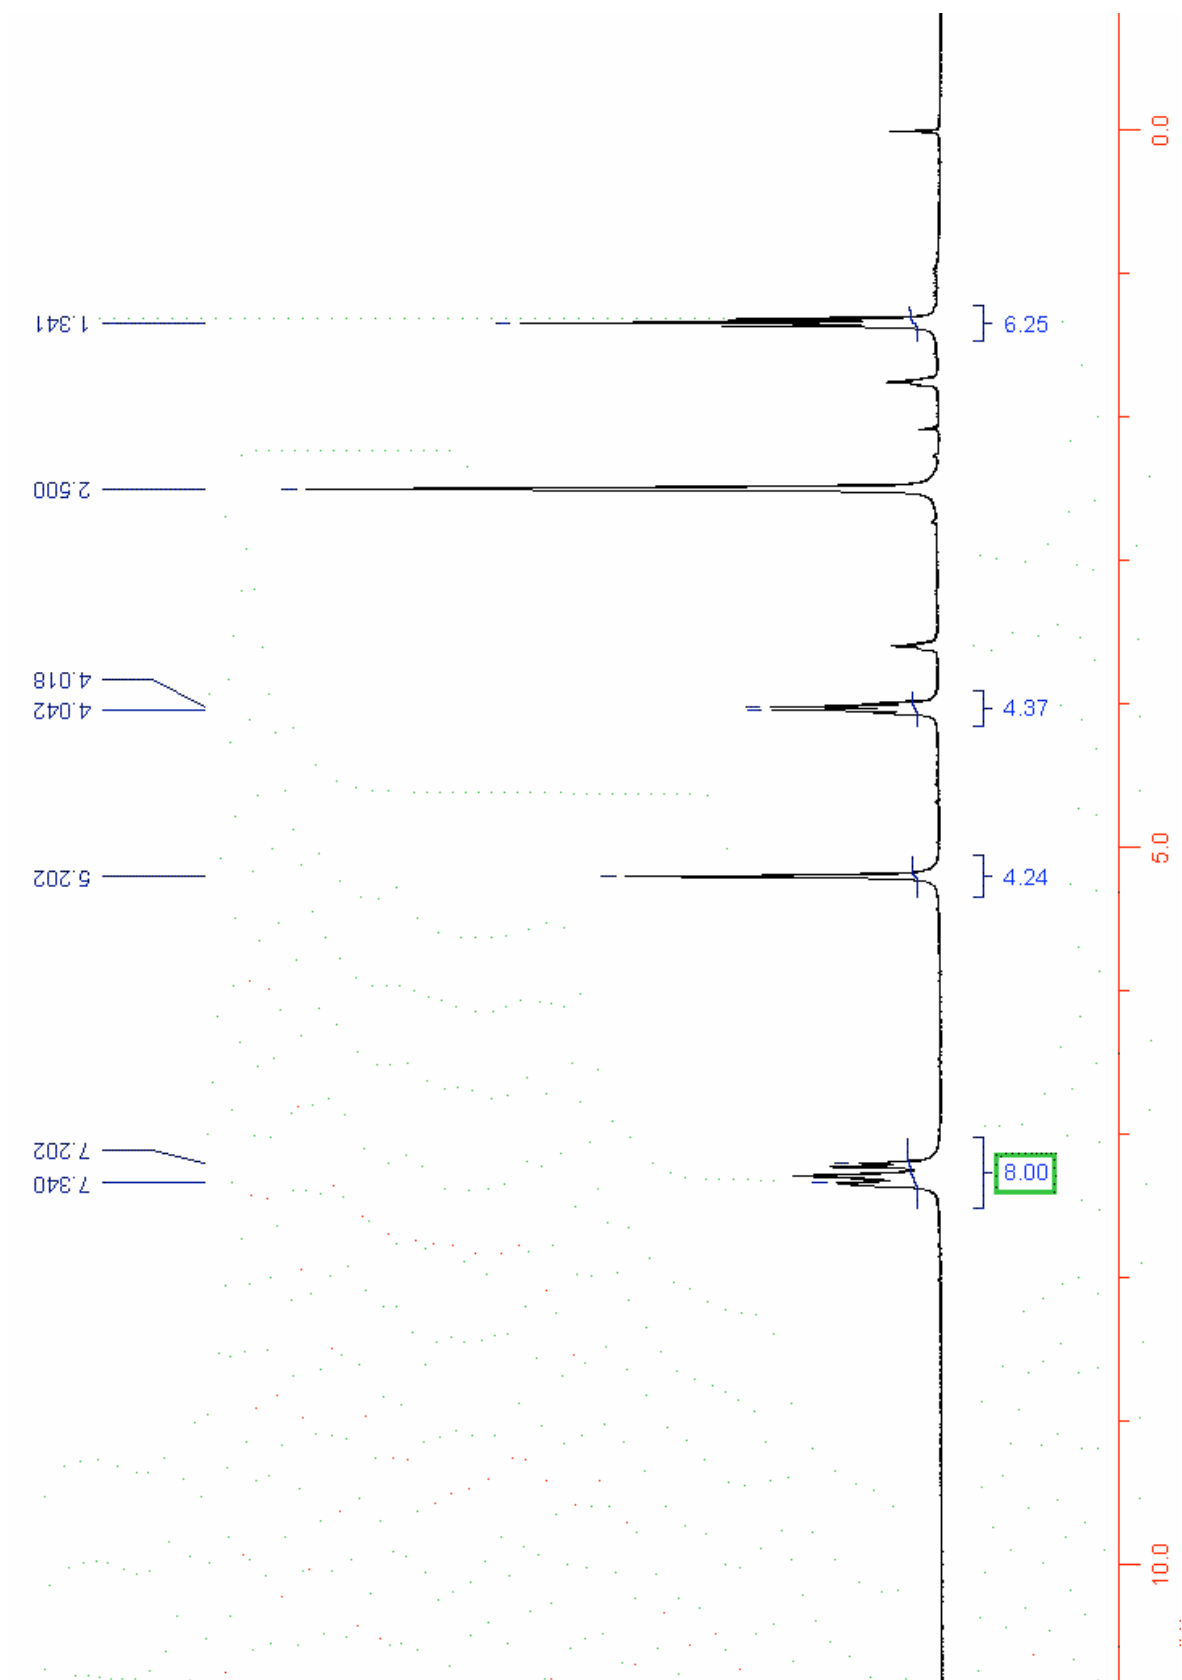

compound 3 ( $^1\text{H}$ , DMSO)

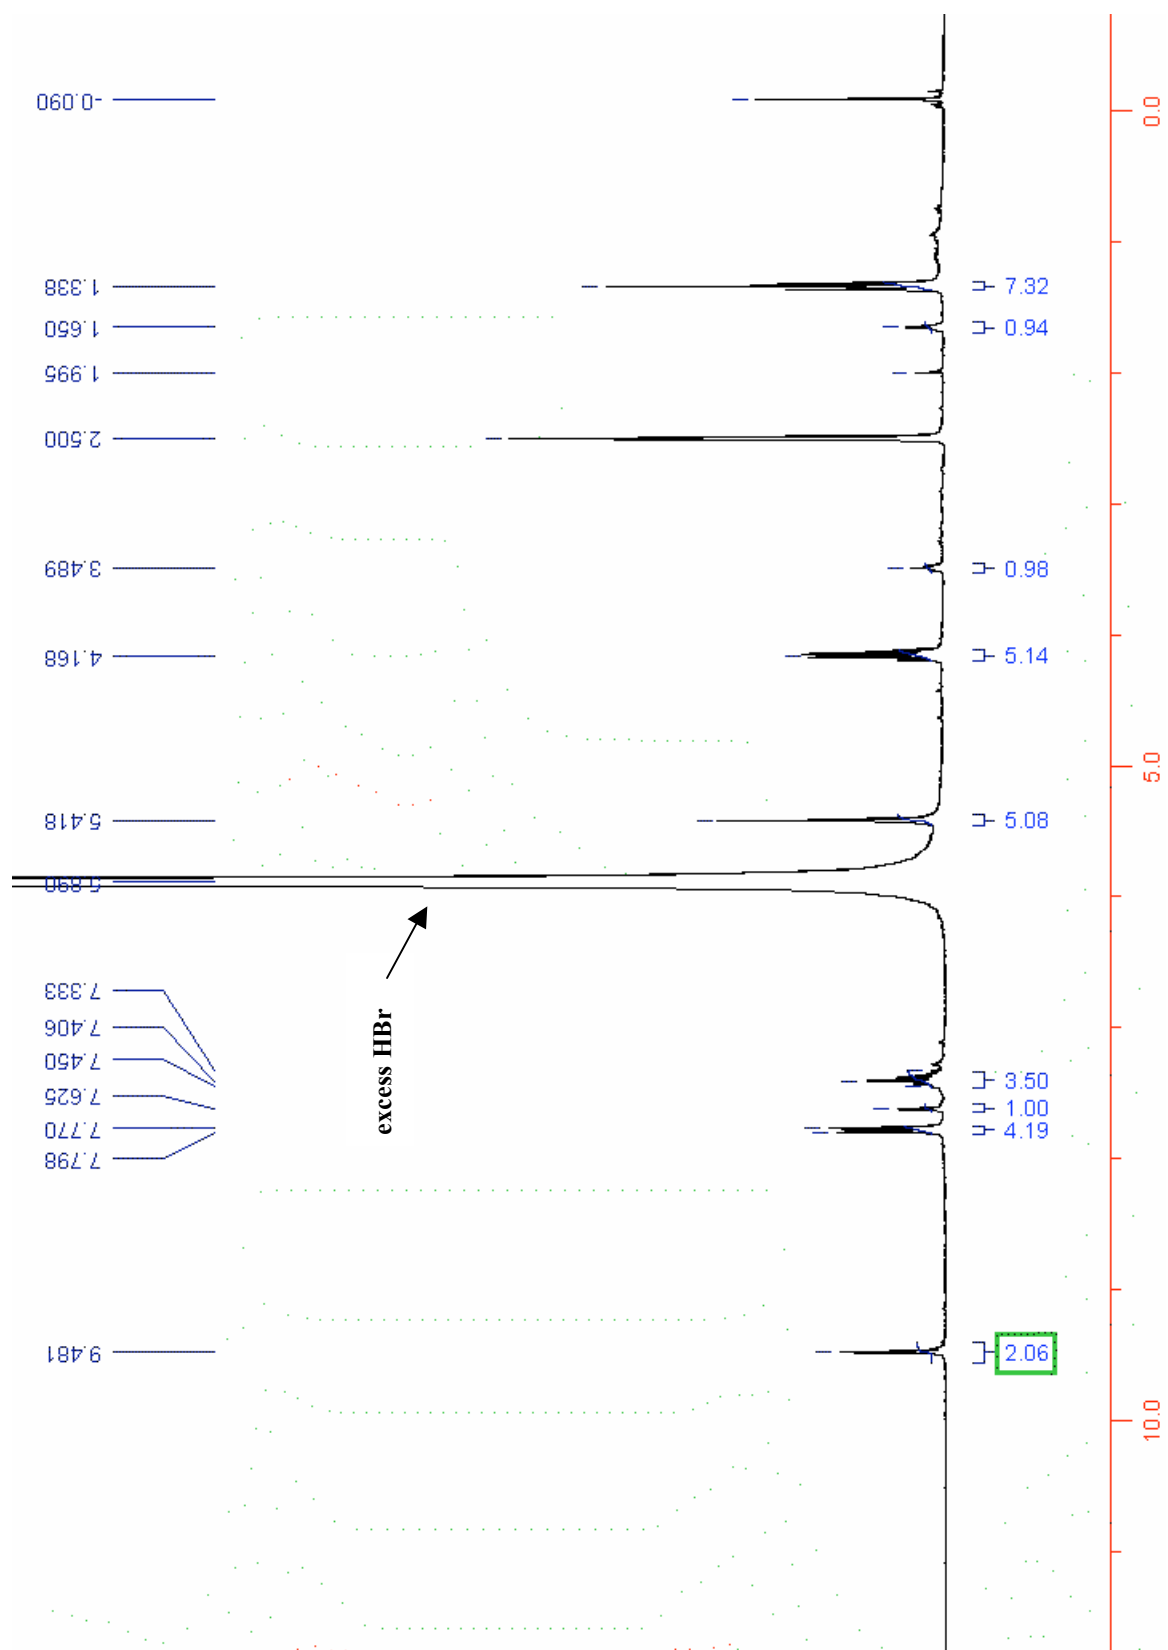

compound 4 ( $^1\text{H}$ , DMSO)

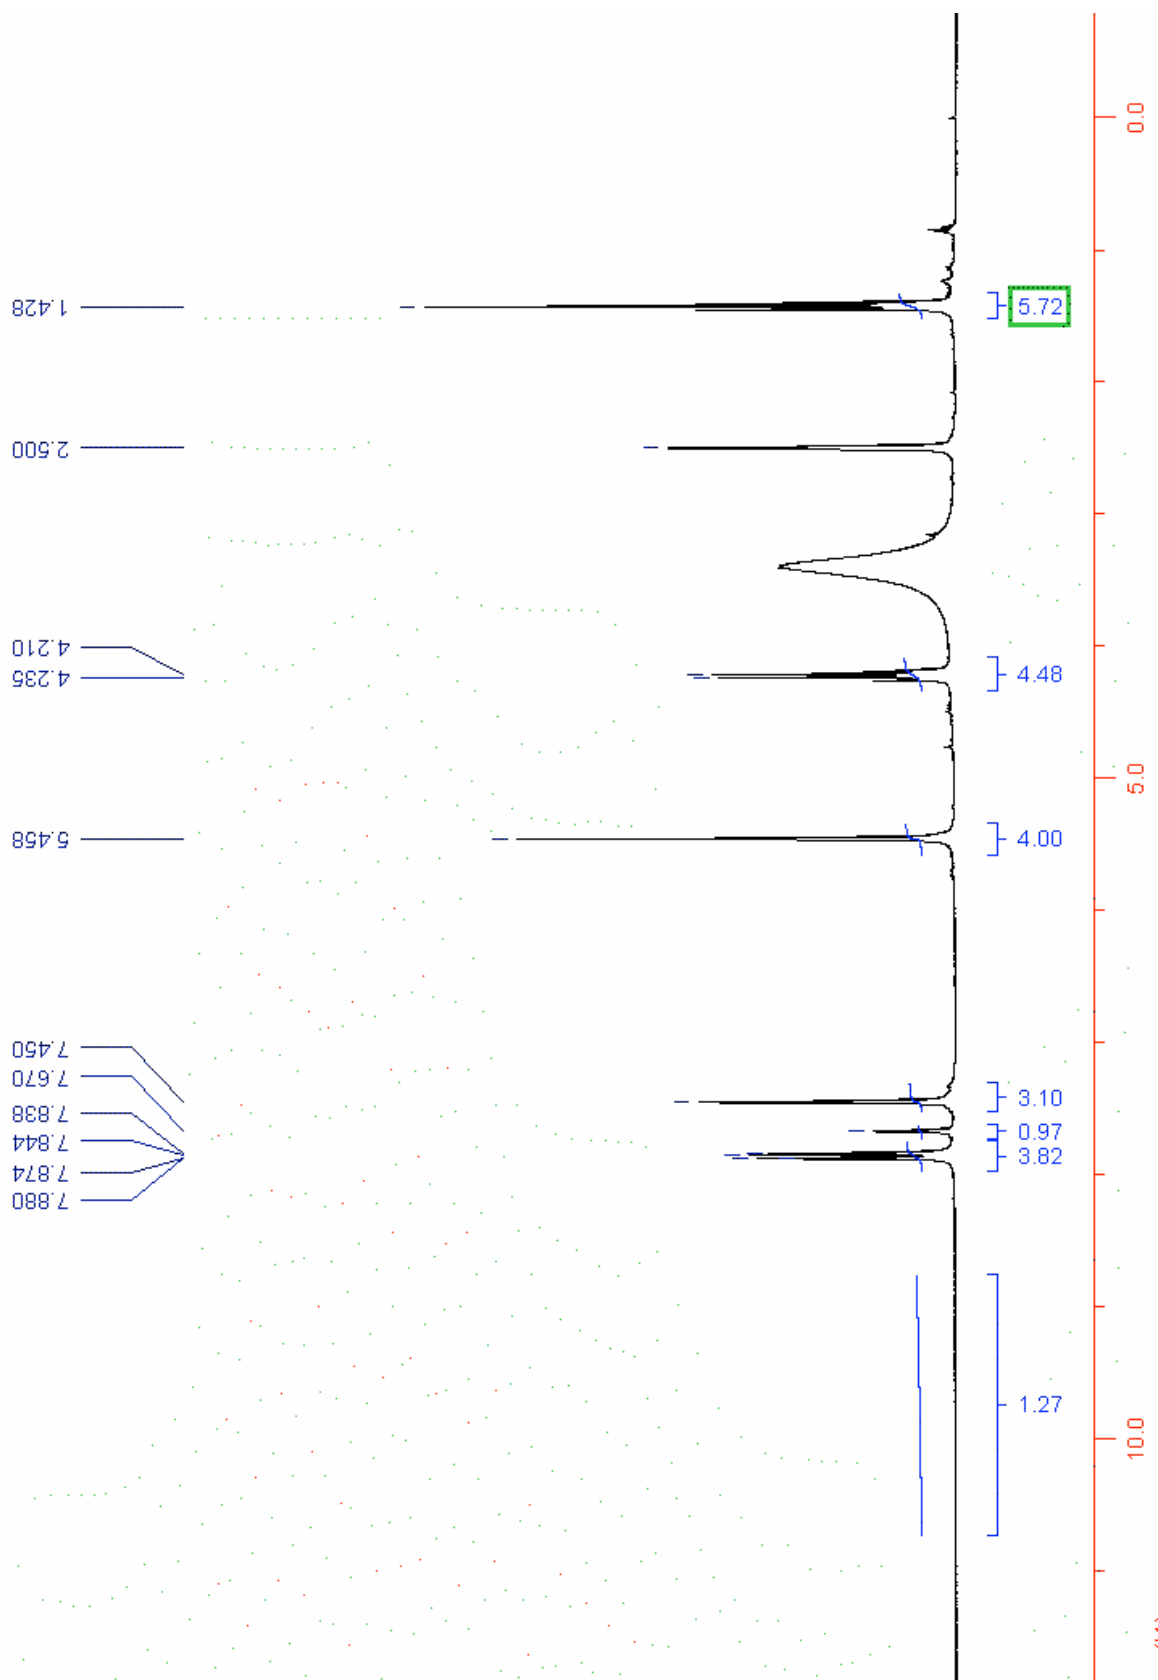

compound 6 ( $^1\text{H}$ , DMSO)

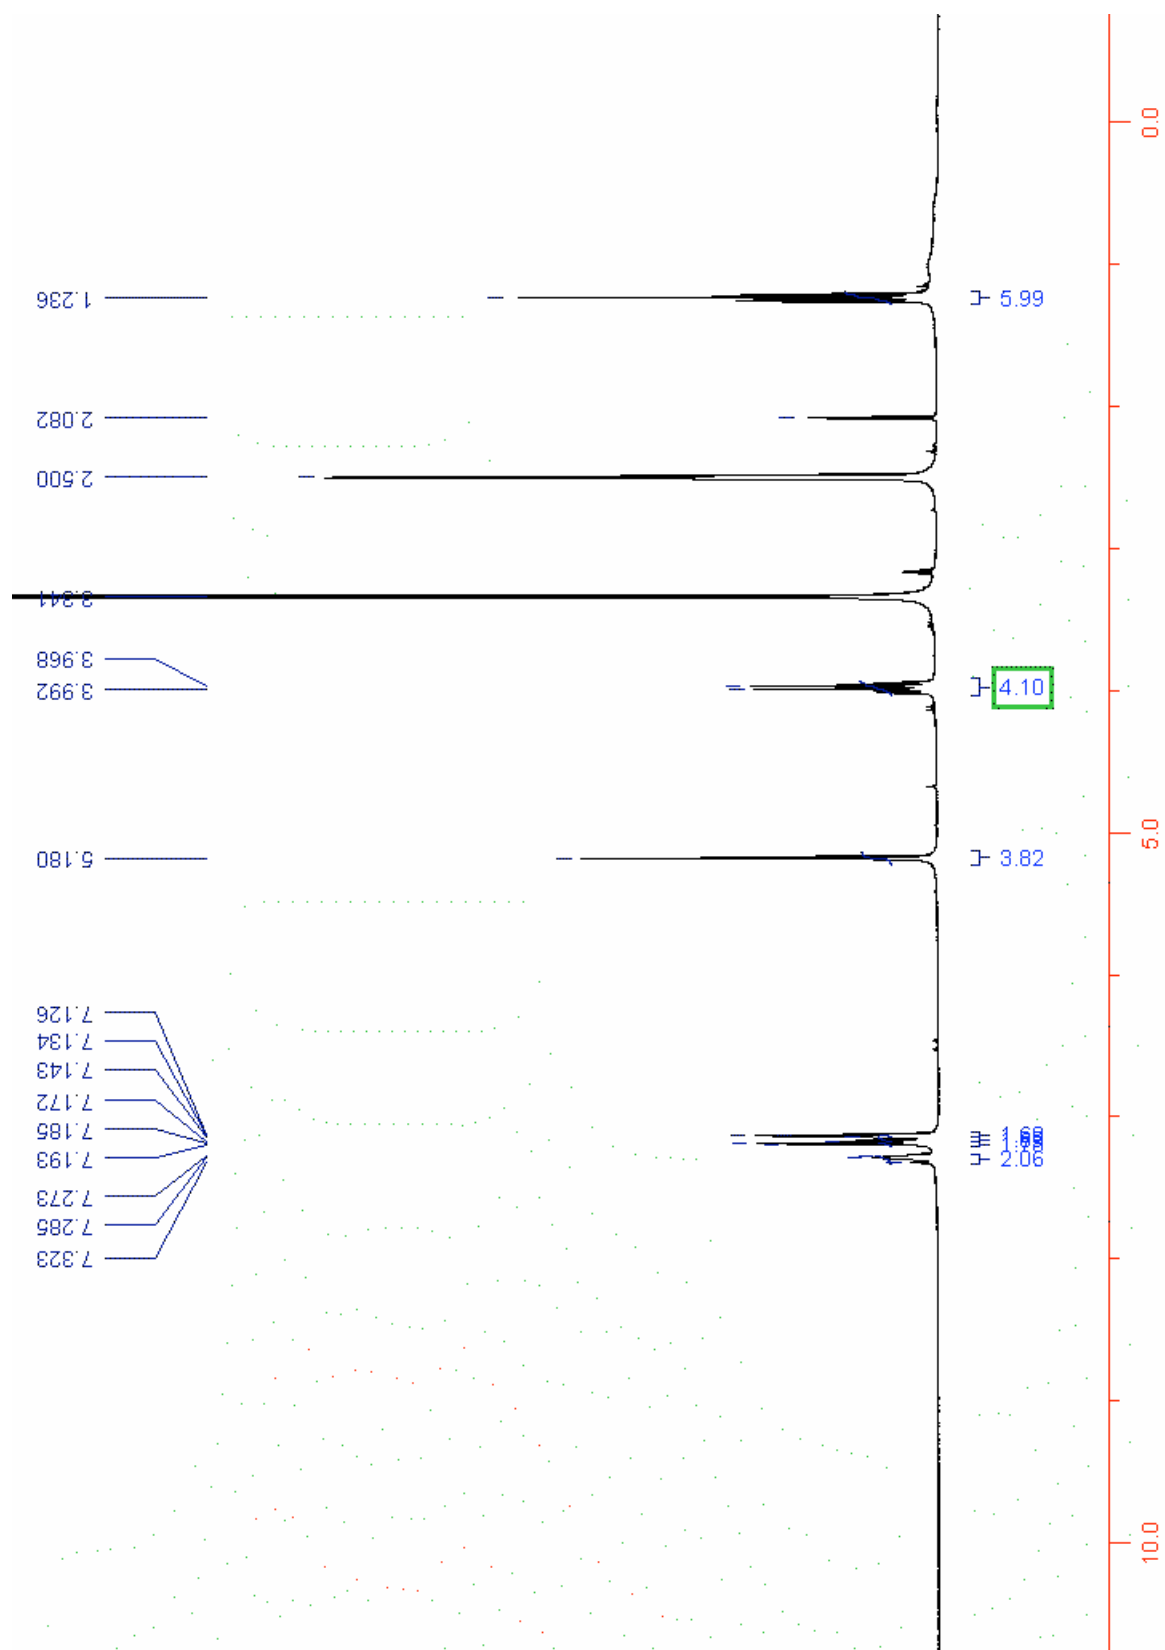



compound **6** ( $^{13}\text{C}$ , DMSO)

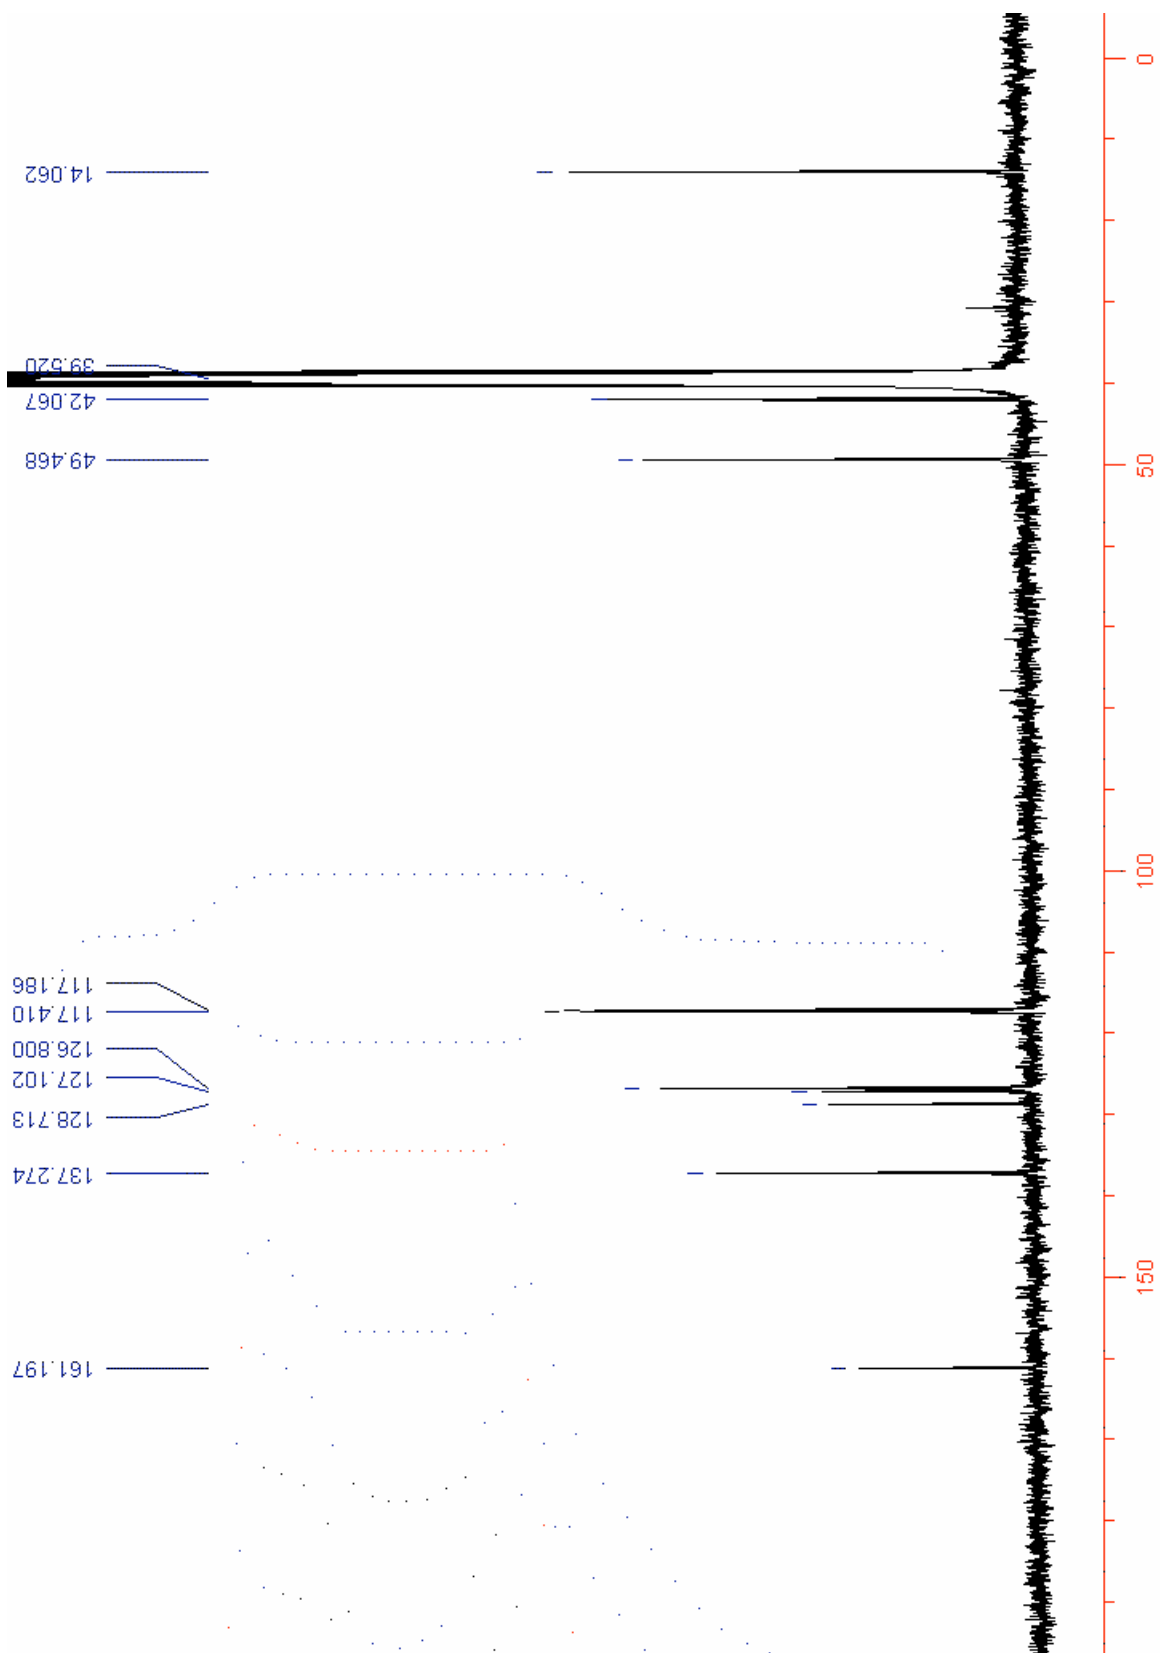

compound 7 ( $^1\text{H}$ ,  $\text{CD}_2\text{Cl}_2$ )

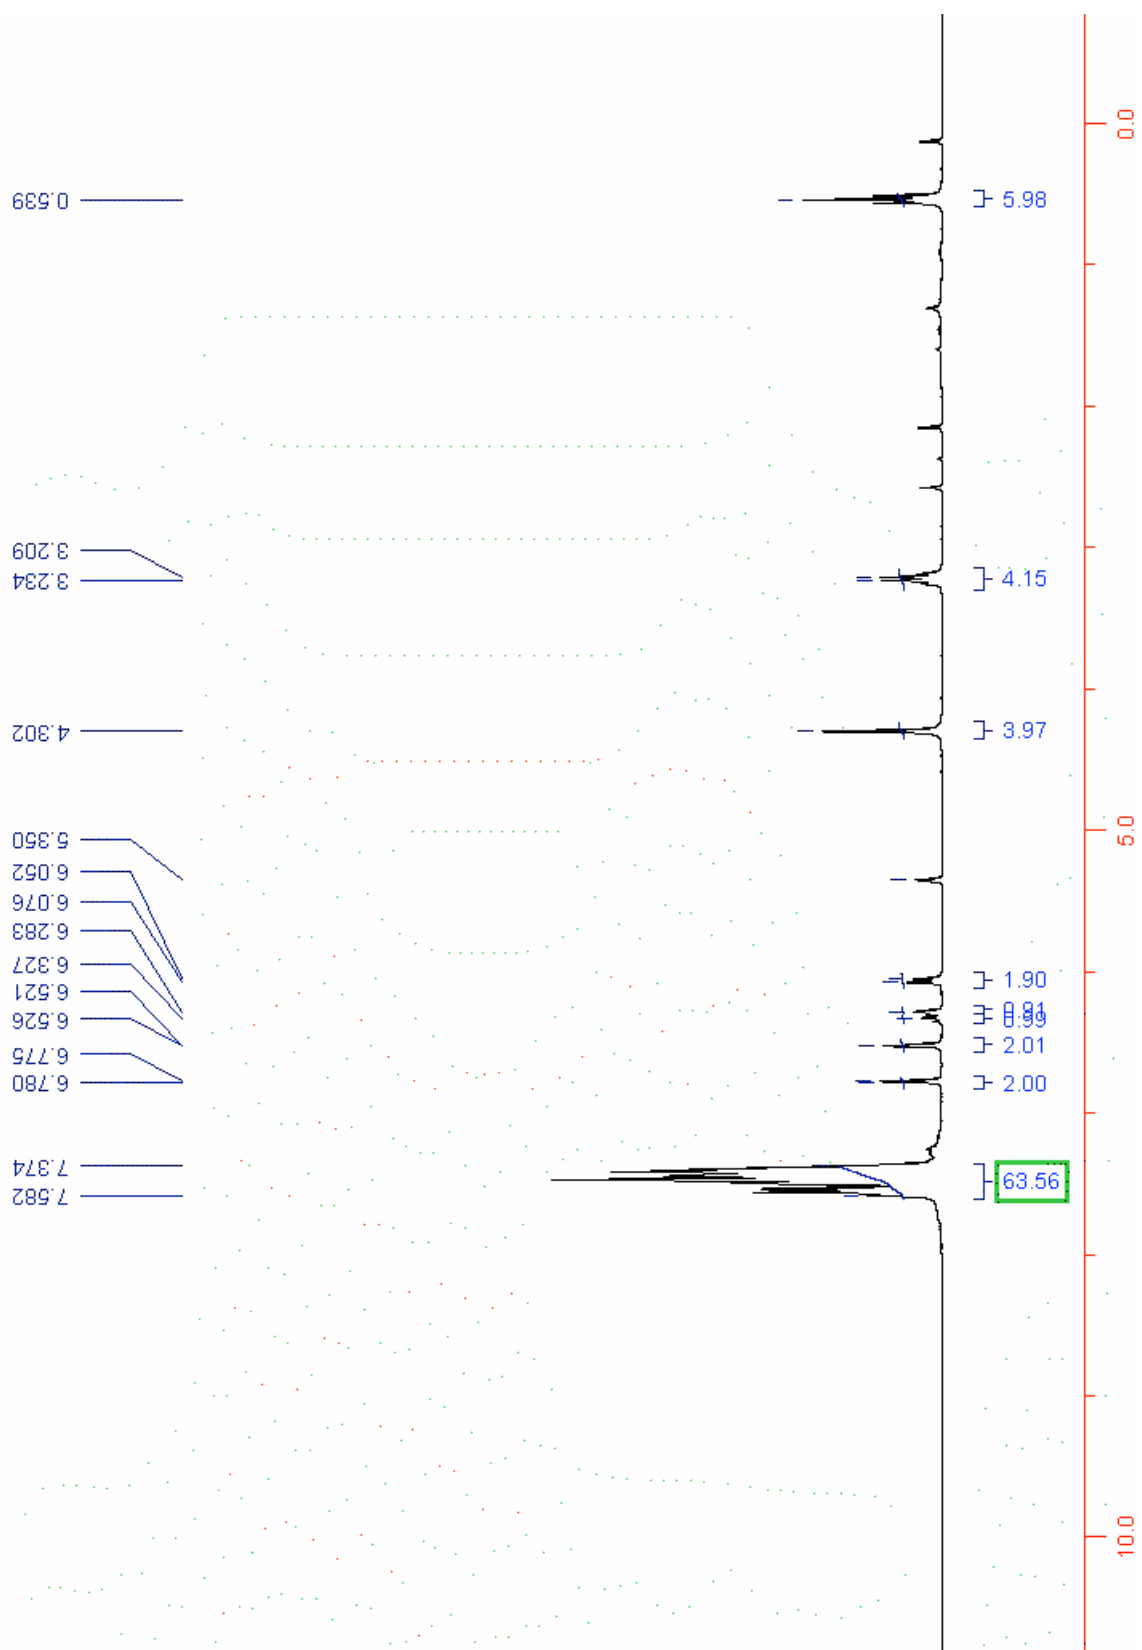

compound 7 ( $^{13}\text{C}$ ,  $\text{CD}_2\text{Cl}_2$ )

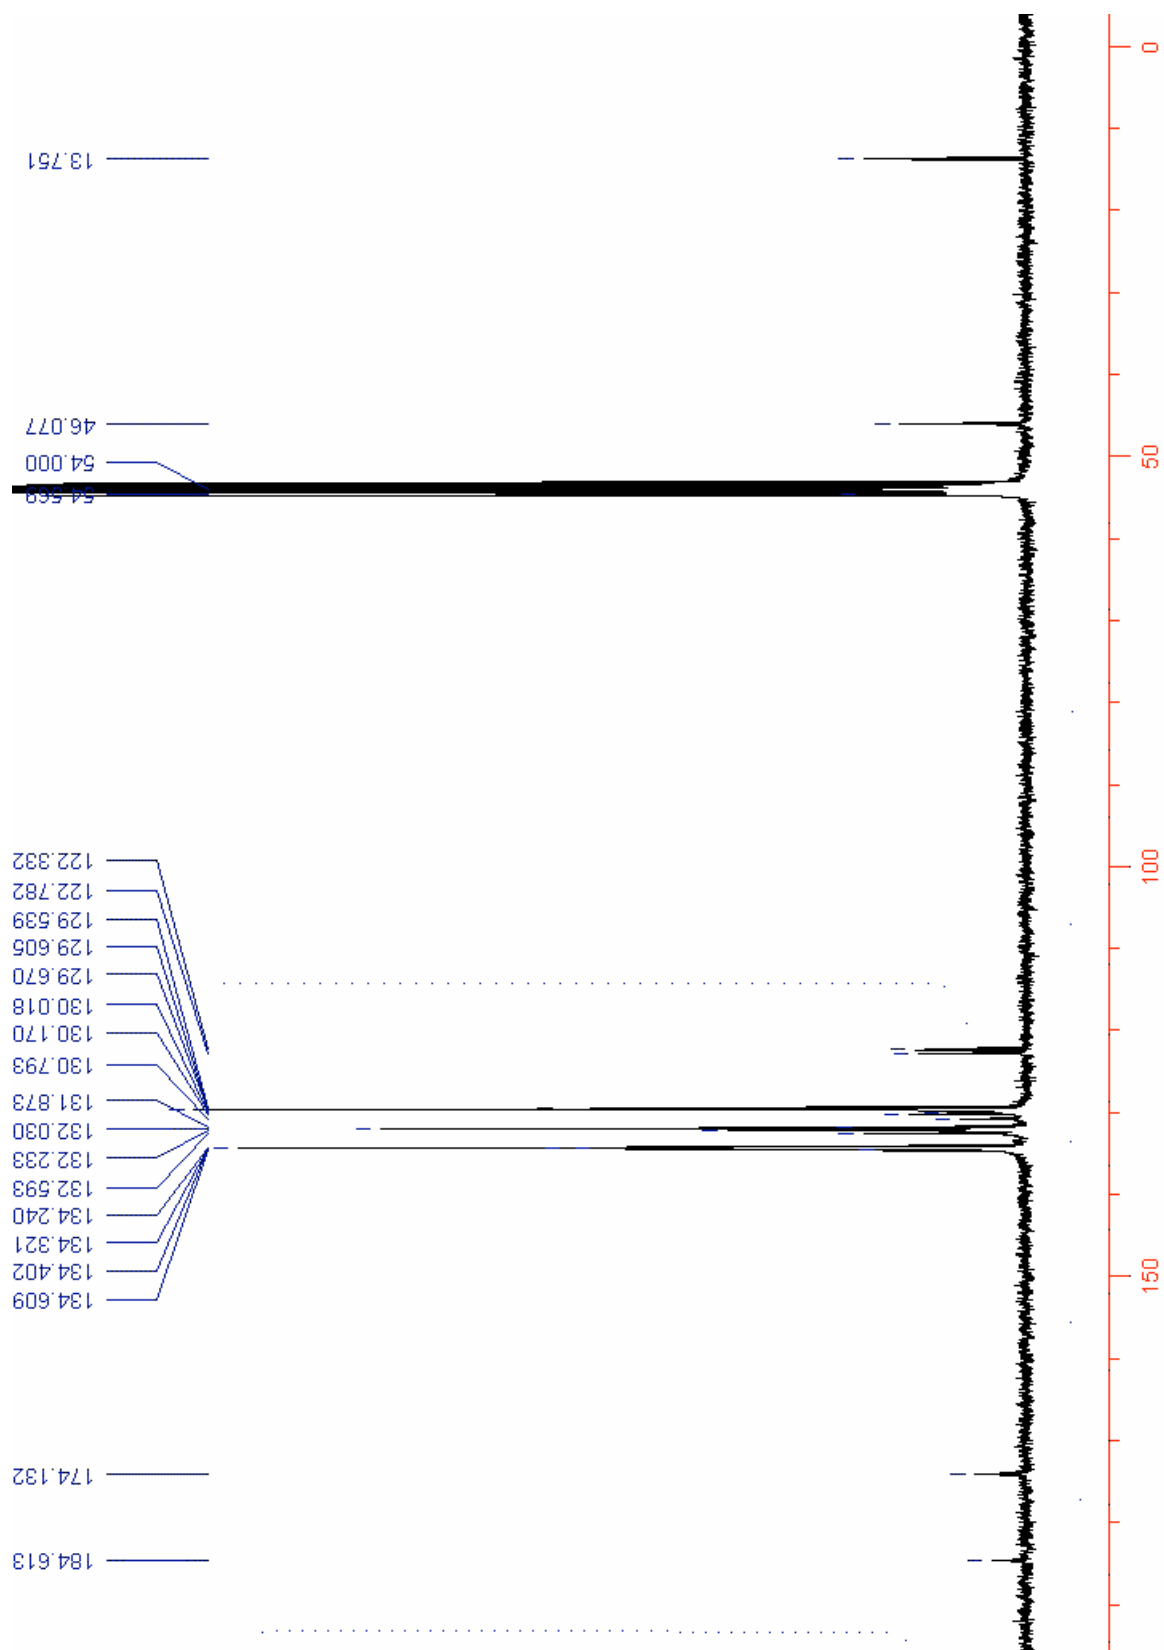

compound **8** ( $^1\text{H}$ ,  $\text{CD}_2\text{Cl}_2$ )

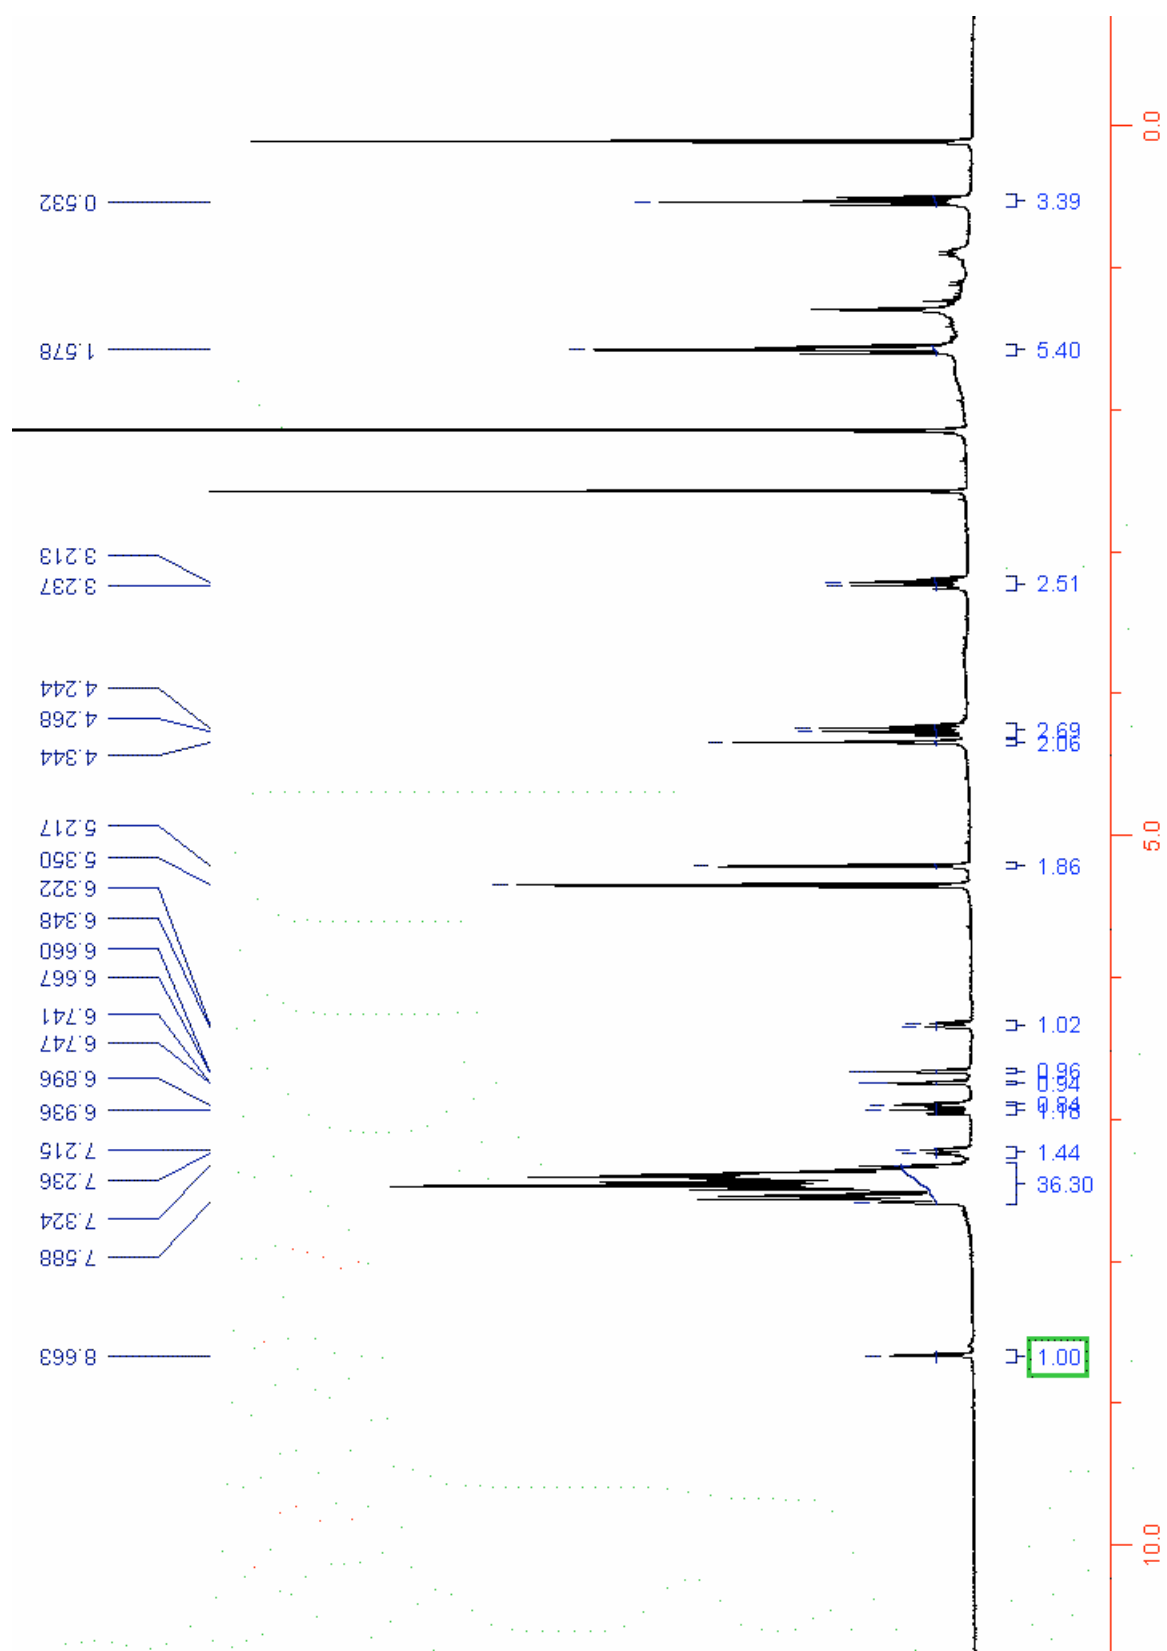

compound **8** ( $^{13}\text{C}$ ,  $\text{CD}_2\text{Cl}_2$ )

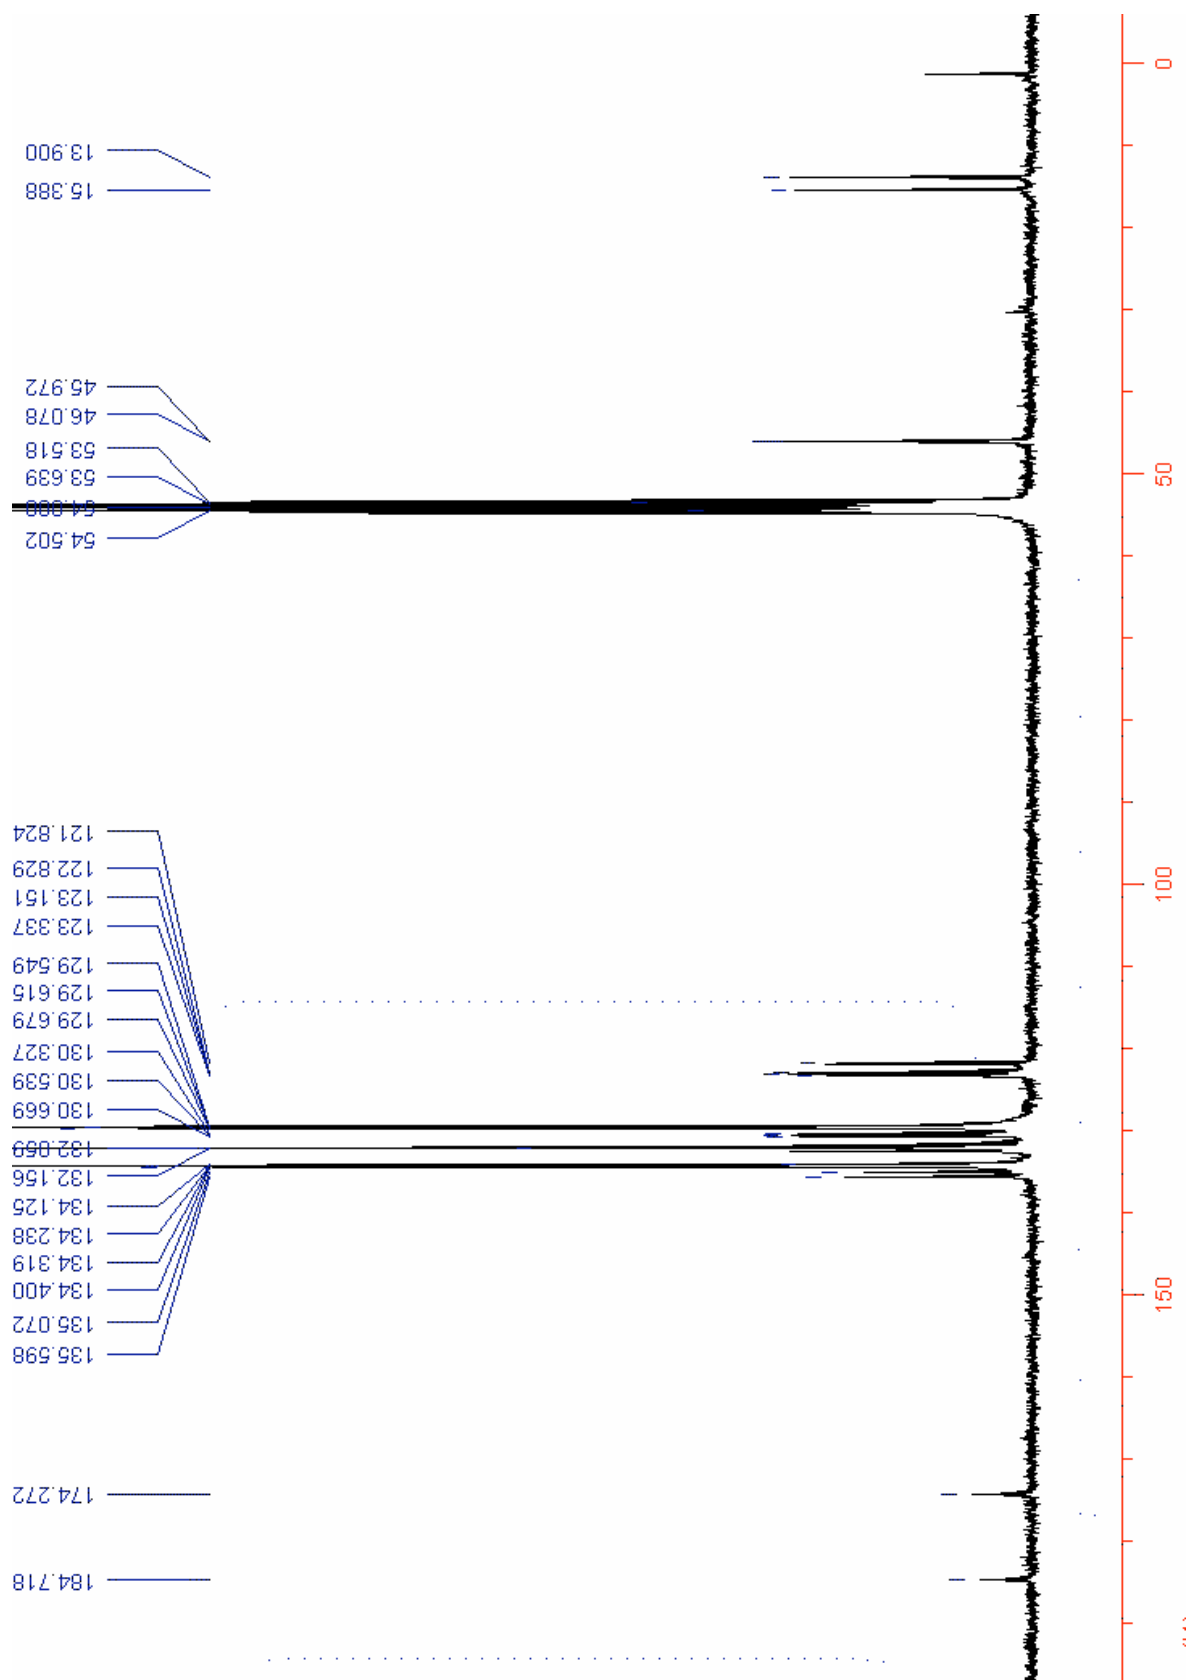

compound **9** ( $^1\text{H}$ ,  $\text{CD}_2\text{Cl}_2$ )

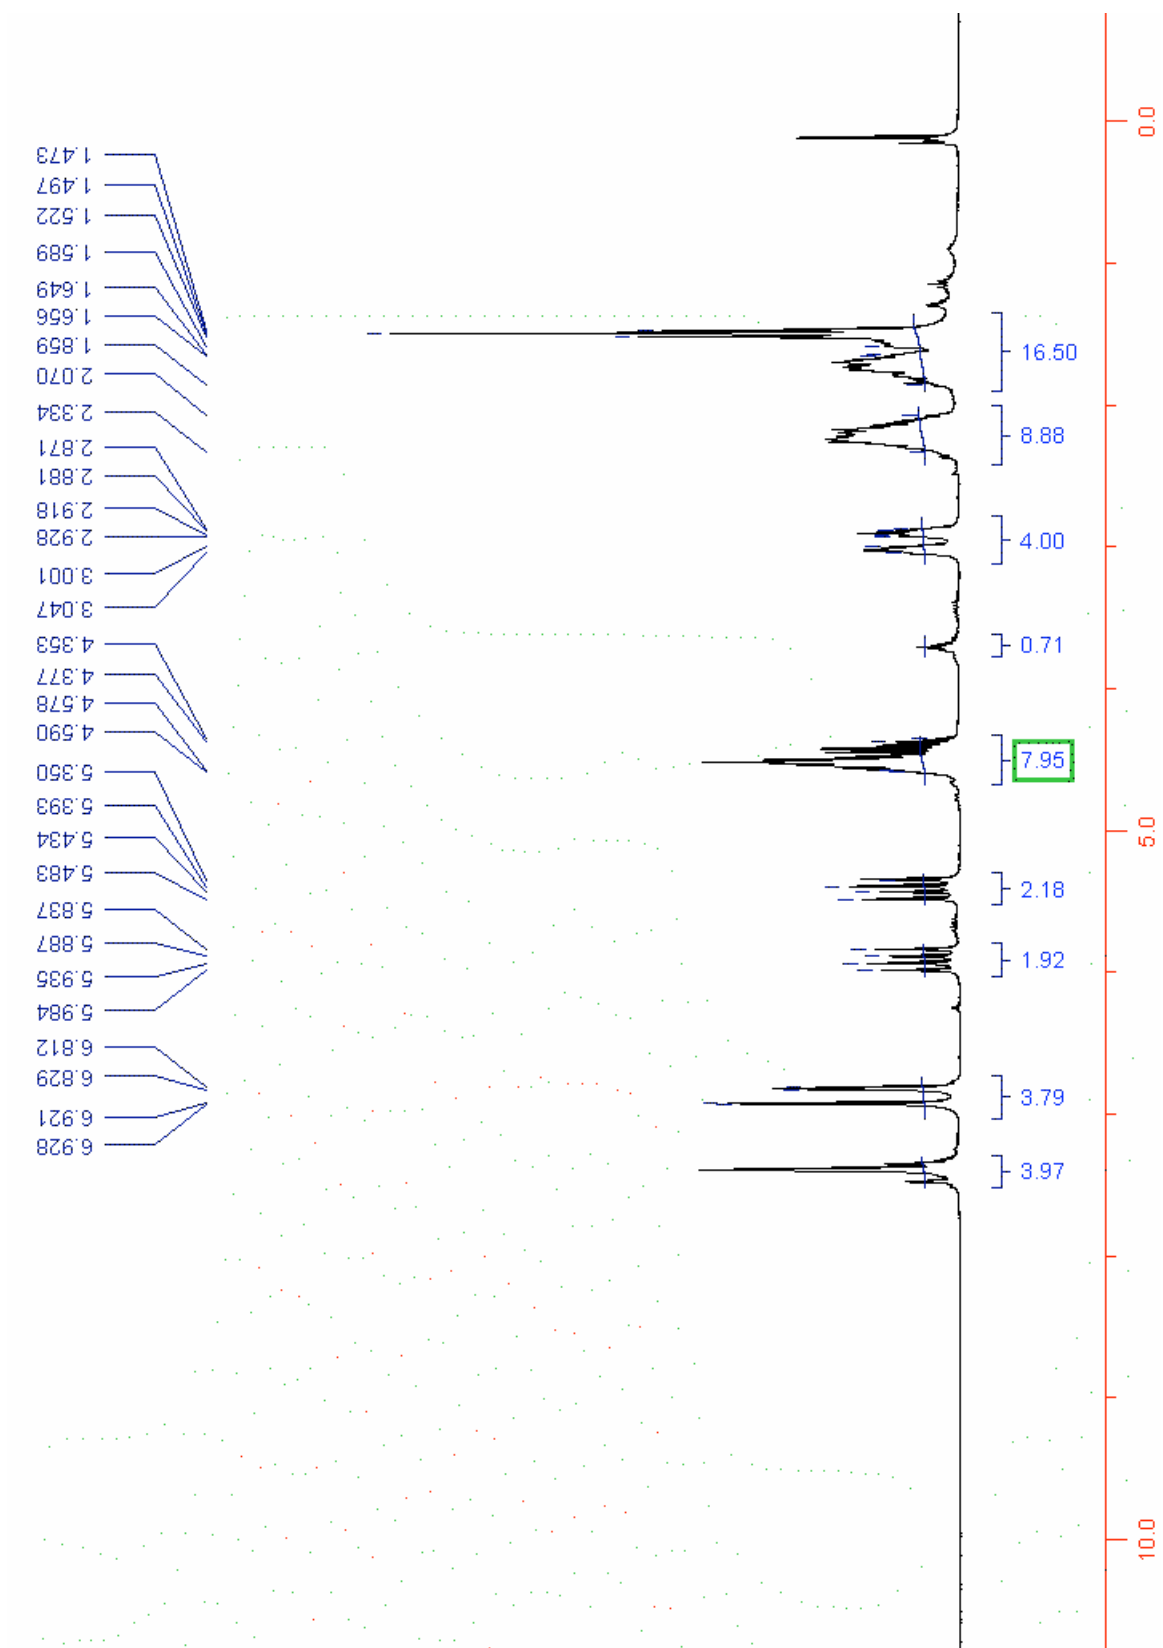

compound **9** ( $^{13}\text{C}$ ,  $\text{CDCl}_3$ )

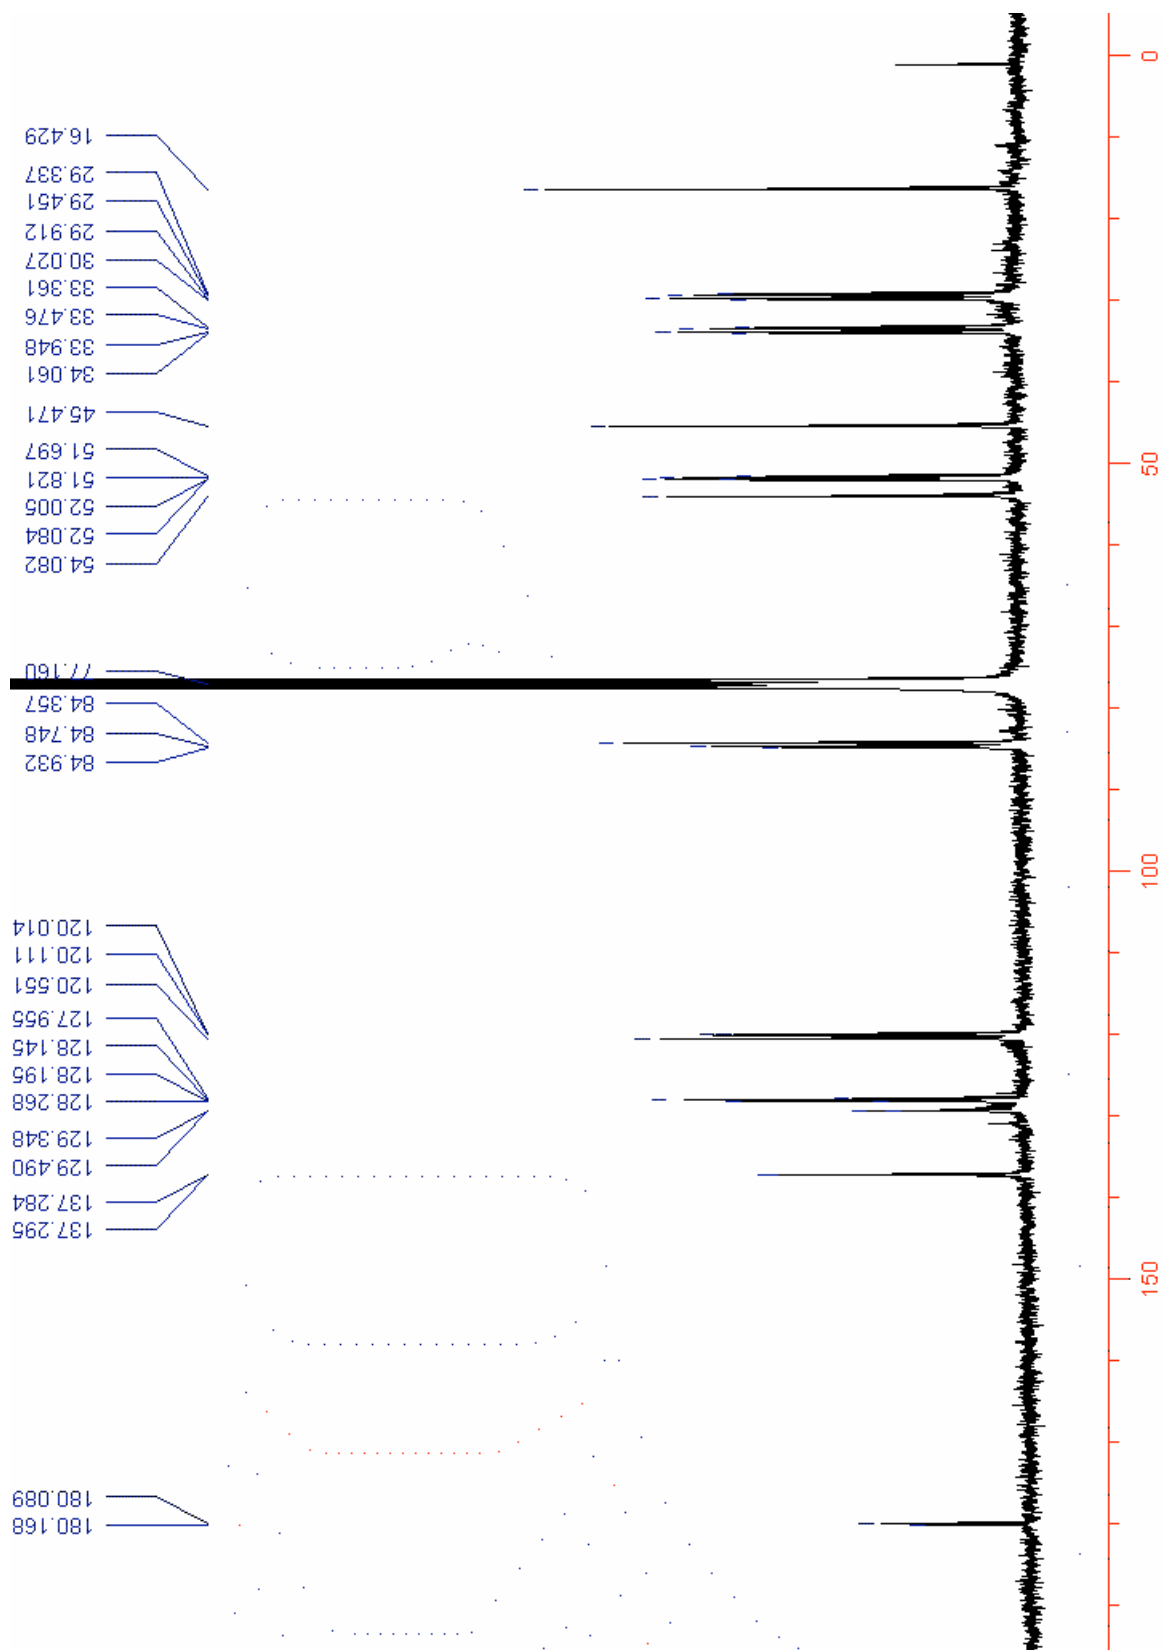

compound **10** ( $^1\text{H}$ ,  $\text{CD}_2\text{Cl}_2$ )

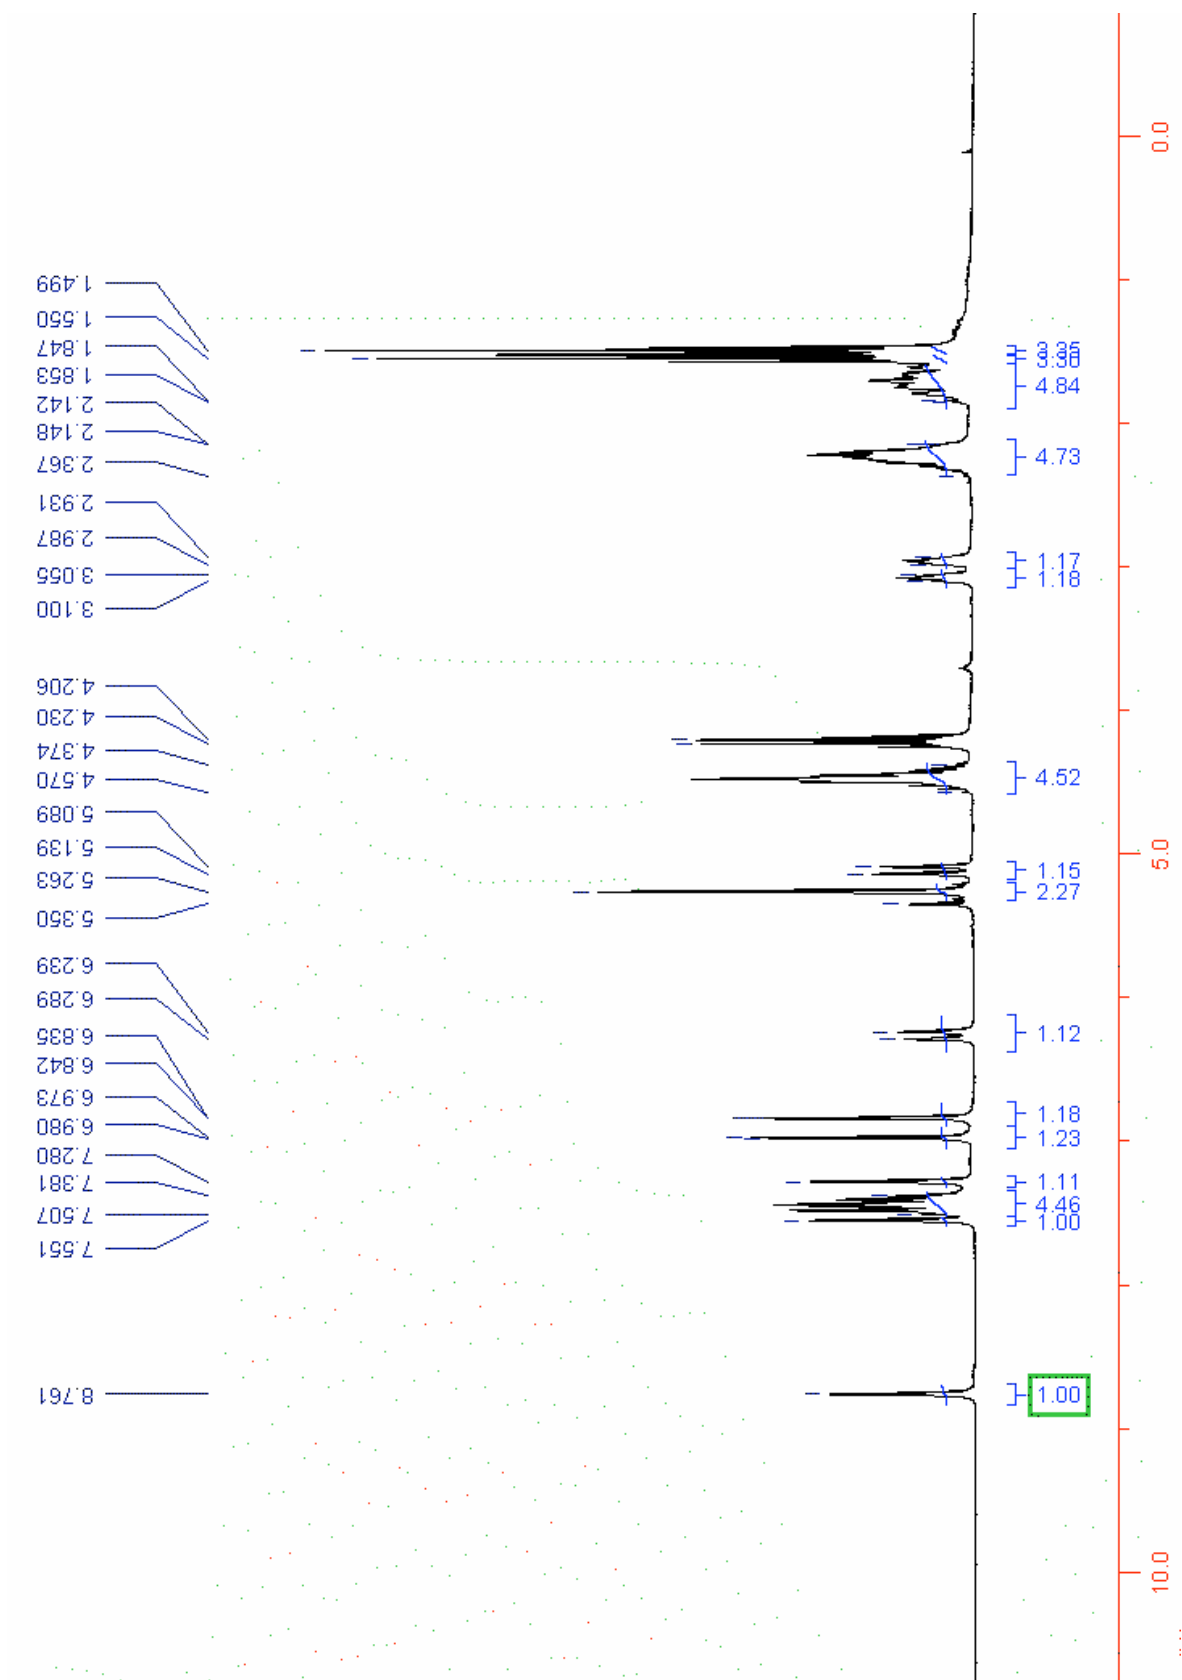



compound **10** ( $^{13}\text{C}$ ,  $\text{CD}_2\text{Cl}_2$ )

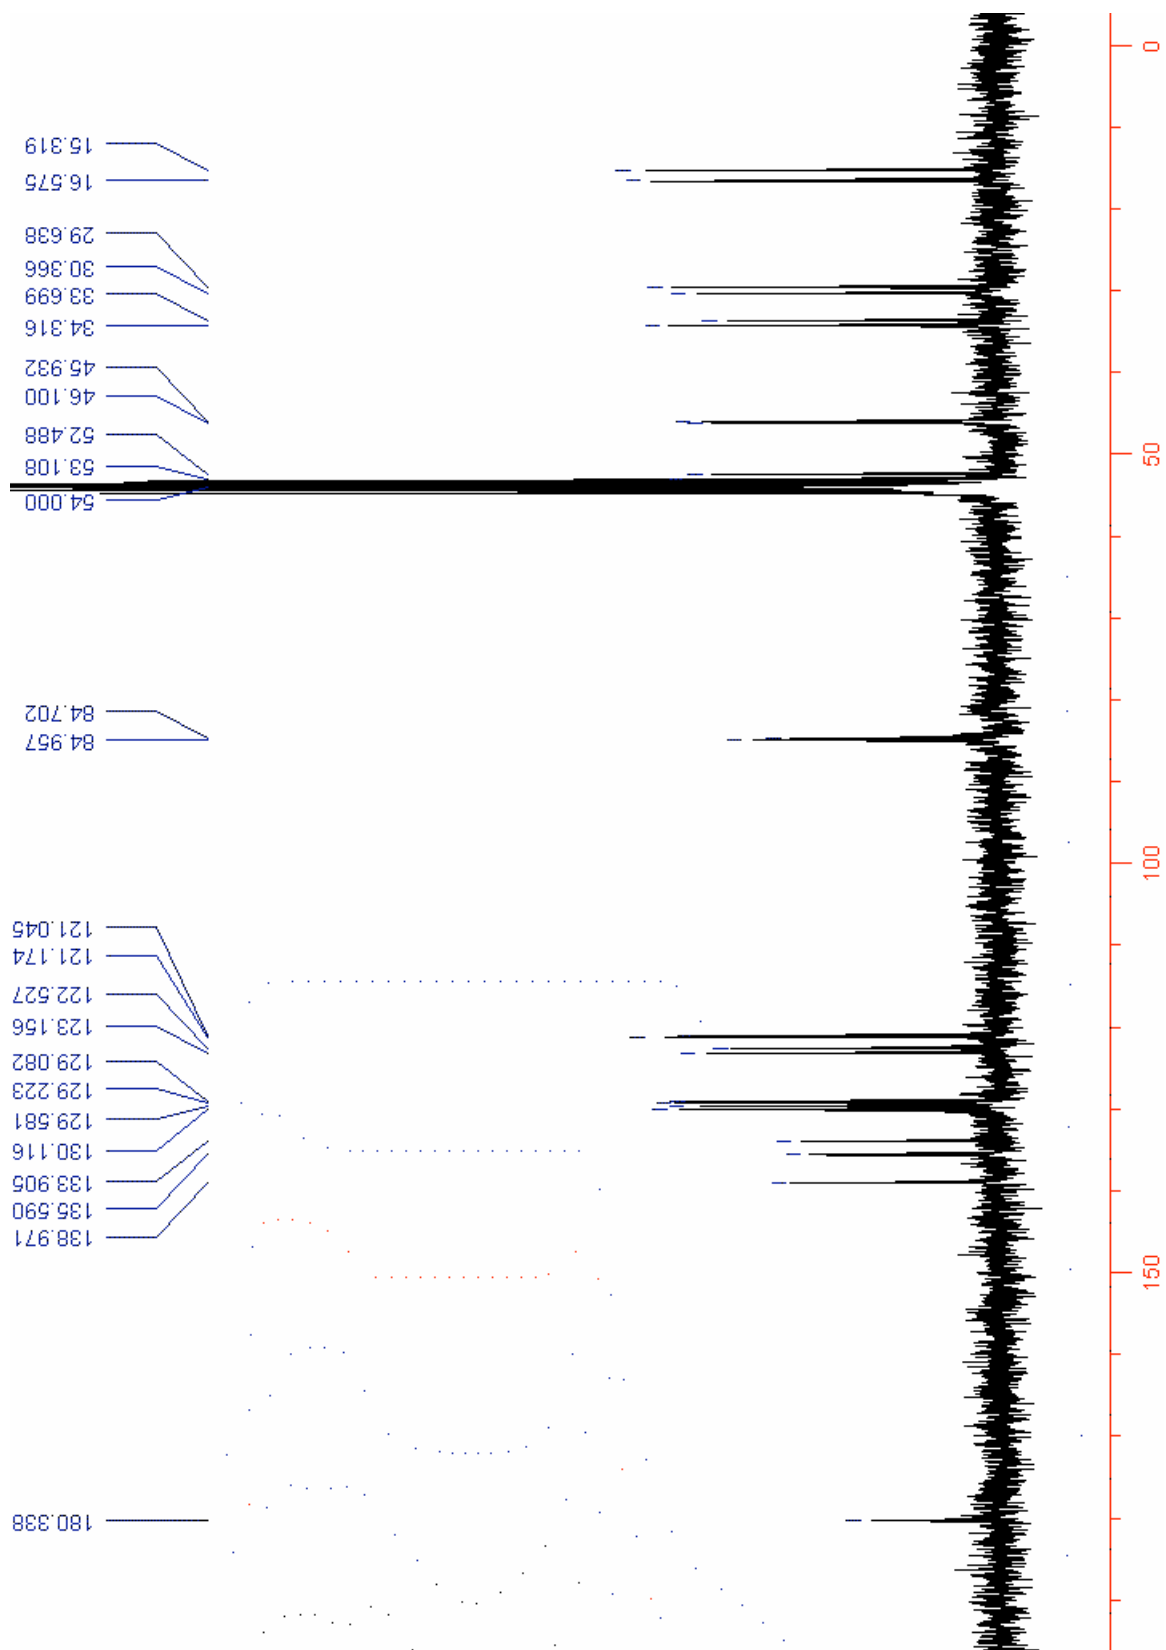

compound 11 ( $^1\text{H}$ ,  $\text{CDCl}_3$ )

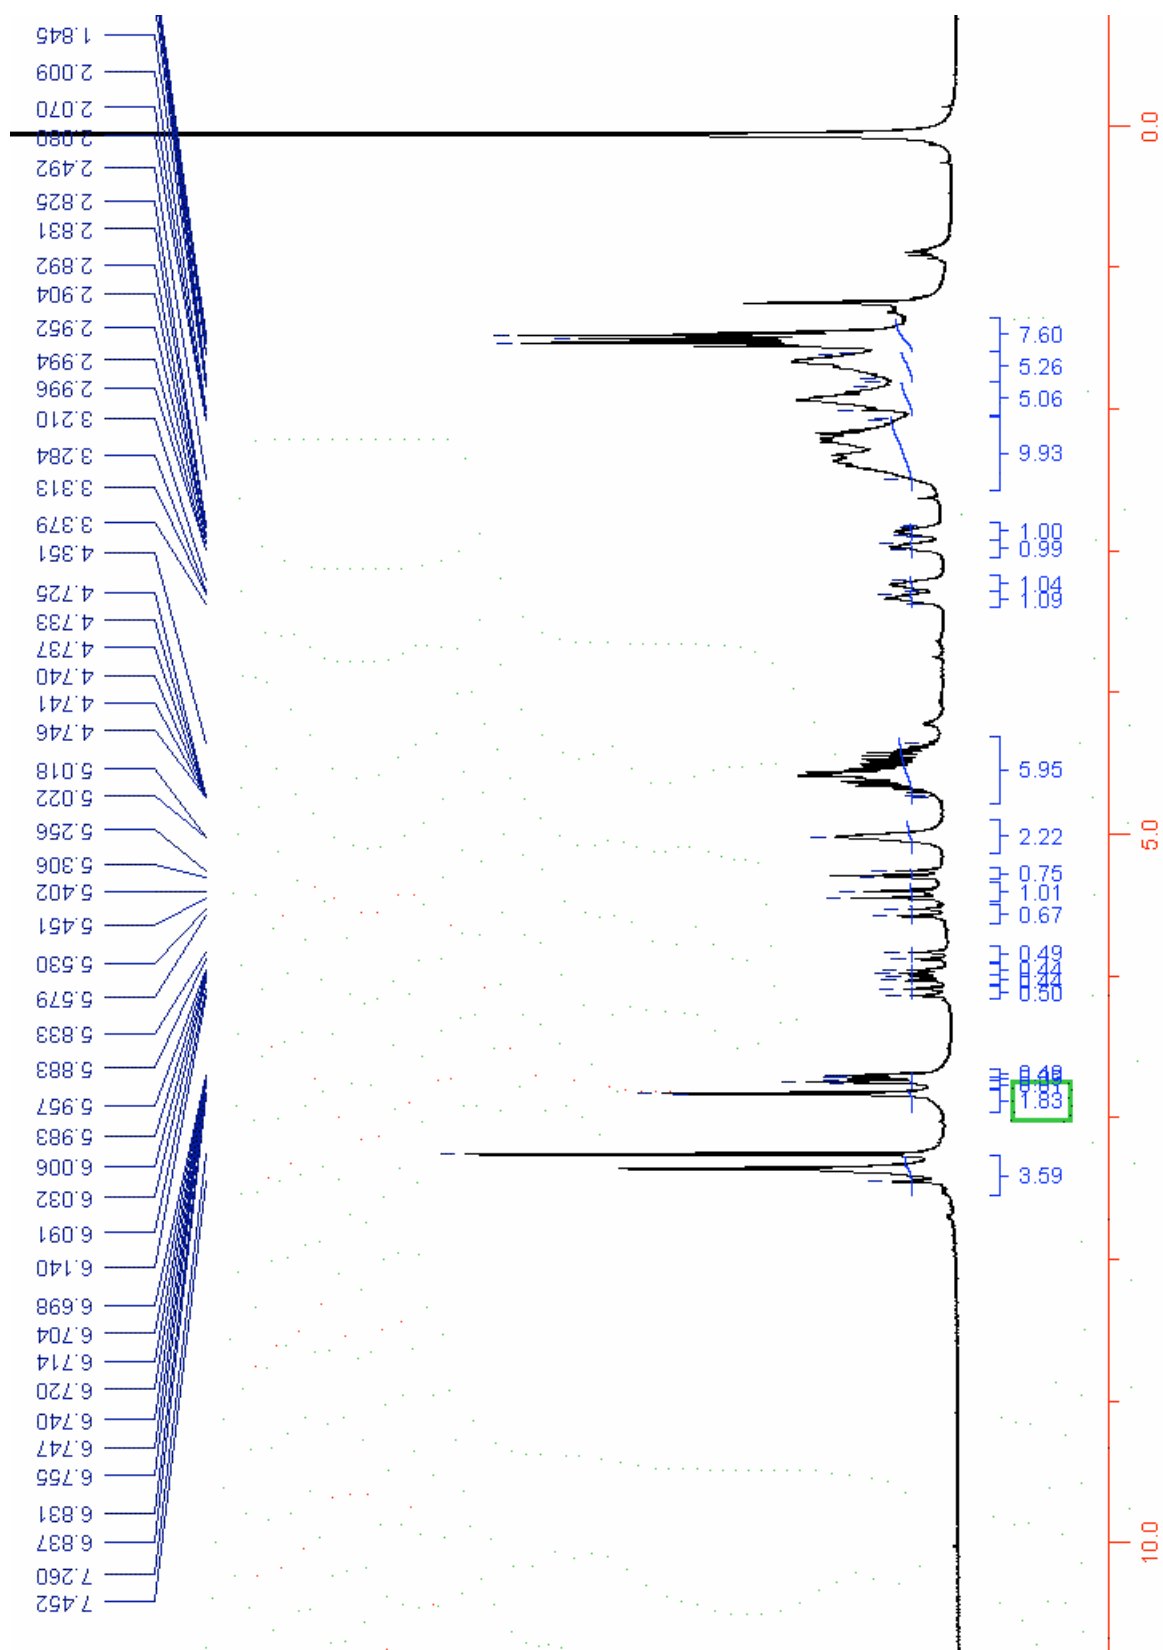

compound **11** ( $^{13}\text{C}$ ,  $\text{CDCl}_3$ )

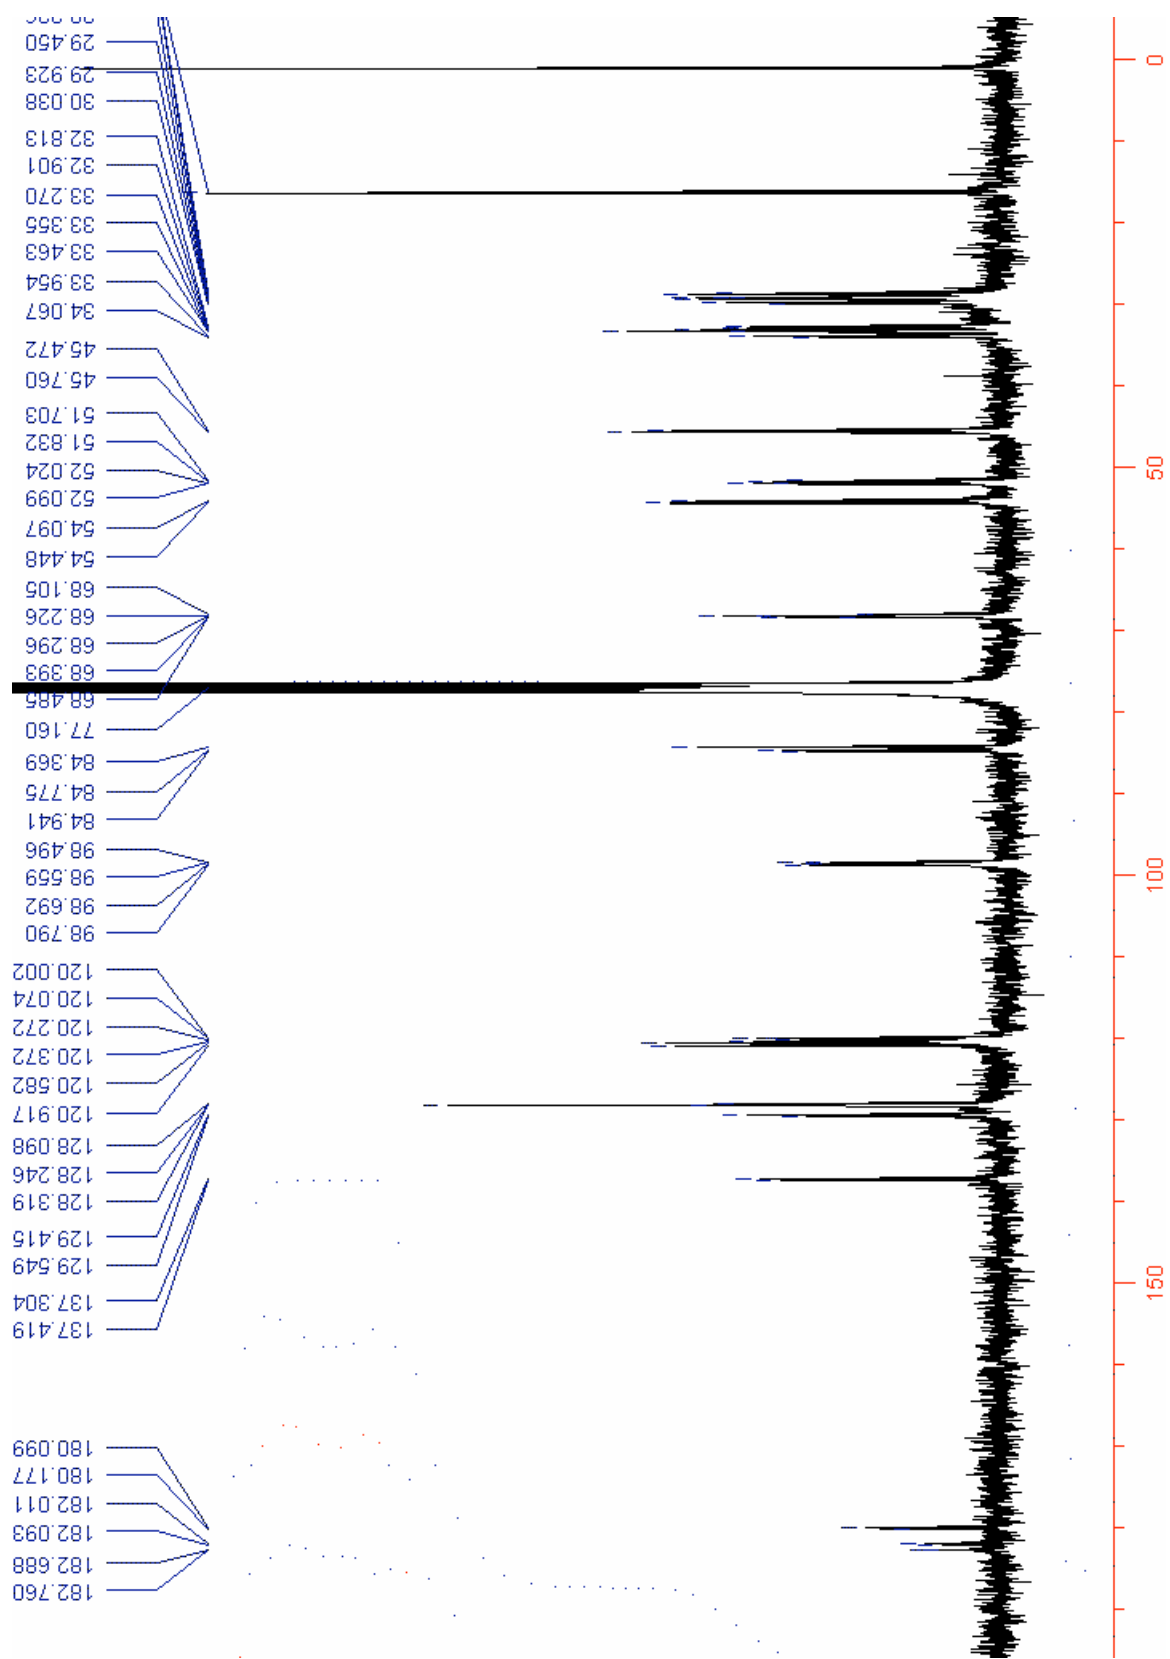

Supplement: b902733e.pdf [file b902733e.pdf]
